# Supplementary material for: NF-κB-to-AP-1 Switch: A Mechanism Regulating Transition From Endothelial Barrier Injury to Repair in Endotoxemic Mice
Source: PubMed Central journal article supplement — Sci Rep. 2014 Jul 2;4:5543. doi: 10.1038/srep05543 (PMC4078303; doi:10.1038/srep05543), 2014-07-02
Supplement: srep05543-s1.pdf [file srep05543-s1.pdf]

# NF- $\kappa$ B-to-AP-1 Switch: A Mechanism Regulating Transition From Endothelial Barrier Injury To Repair In Endotoxemic Mice.

Gang Liu, Xiaobing Ye, Edmund J Miller & Shu Fang Liu.

Centers for Heart and Lung Research and Pulmonary and Critical Care Medicine, the Feinstein Institute for Medical Research, Manhasset, NY 11030, USA.

## Supplementary Information

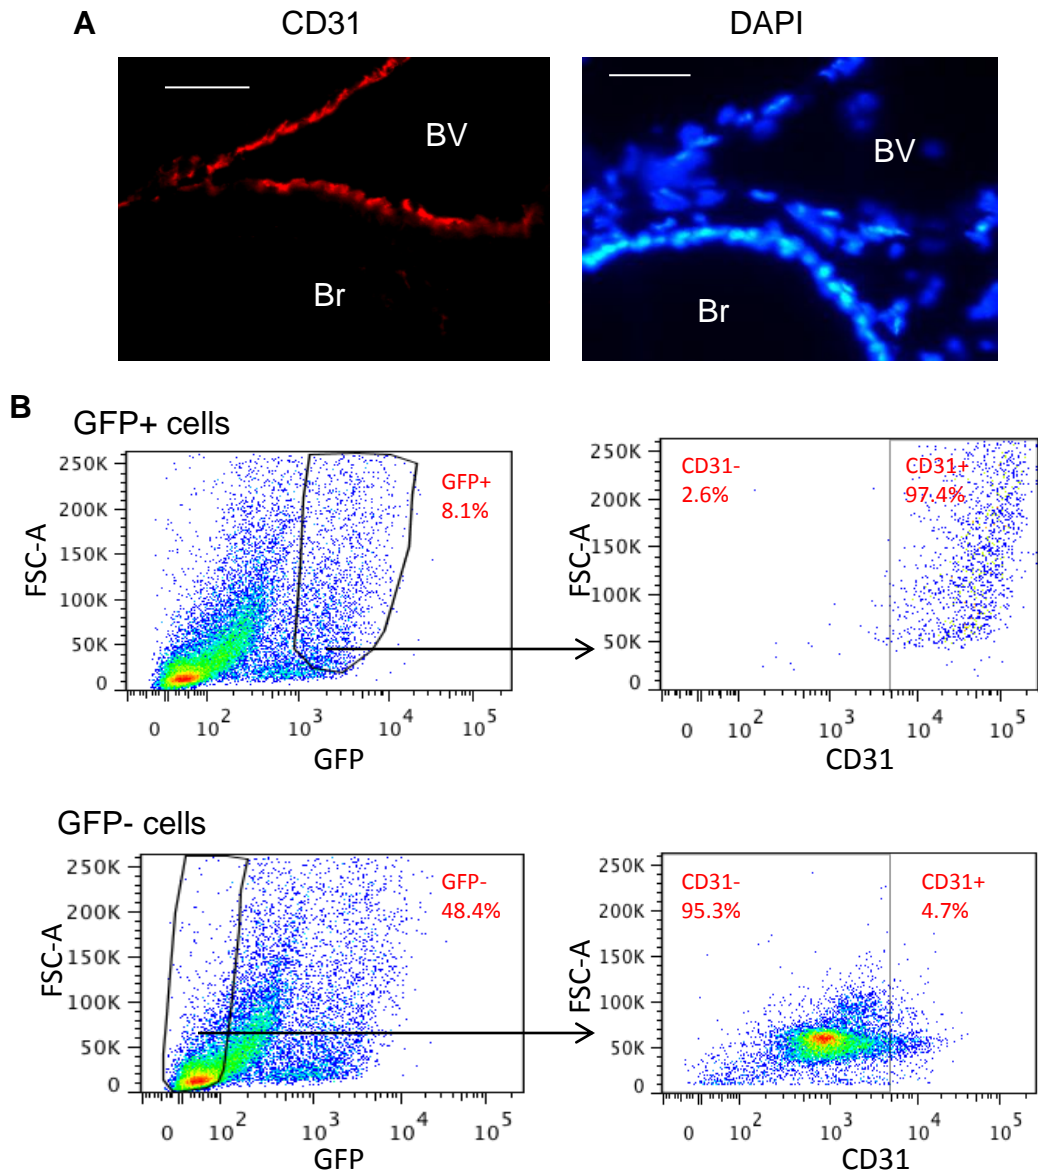

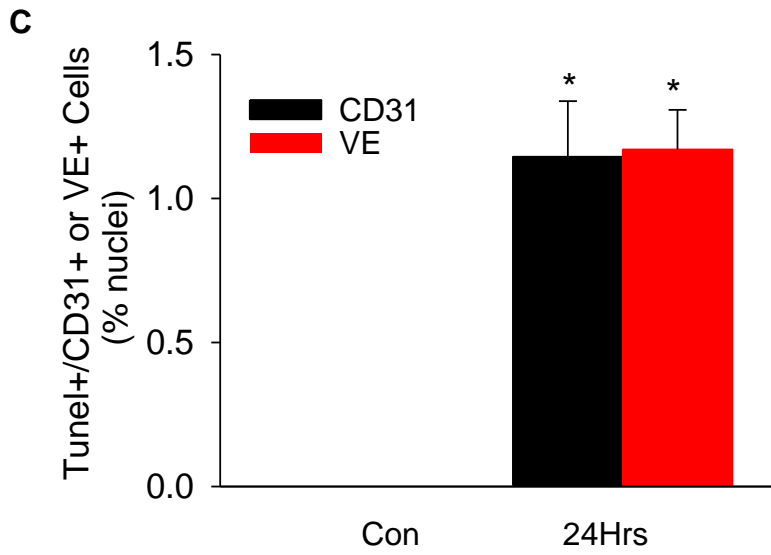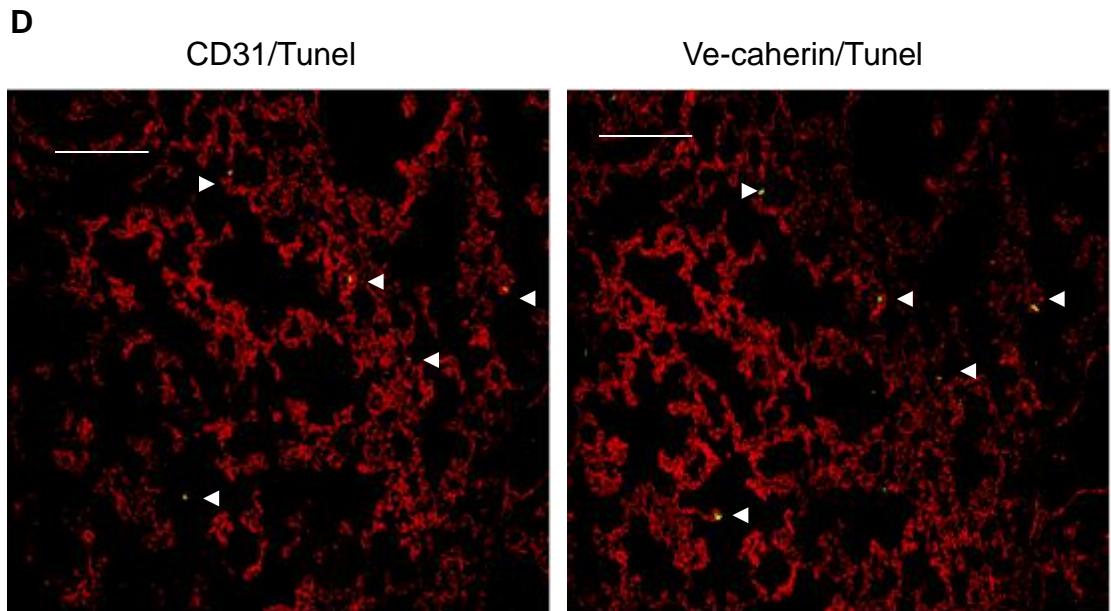

**Supplementary Figure 1.** CD31 and Tunel double-staining detection of apoptotic ECs.

**A:** Representative micrographs of CD31 staining of lung sections show that the CD31 antibody reacts with endothelial cells (ECs) in the lumen of blood vessel (BV), but does not cross-react with epithelial cells in the lumen of bronchiole (Br). Lung sections were stained with anti-CD31 antibody (red) and nuclei counterstained with DAPI (blue). The data are representative of 3 independent experiments. Scale bar, 50  $\mu\text{m}$ . This result verifies that the CD31 antibody reacts with ECs, but not epithelial cells or basal membrane components.

**B:** FACS analysis of lung cells from Tie2-GFP mice shows that 97% of the GFP-positive cells (ECs) are stained CD31-positive, but less than 5% of the GFP-negative cells (non-ECs) are stained CD31-positive. The lung single-cell suspension was prepared from Tie2-GFP mice, stained with CD31 antibody and analyzed. This result confirms the EC-specificity of the CD31 antibody.

**C:** Bar graph shows that the numbers of apoptotic ECs detected by CD31/Tunel and VE-cadherin/Tunel staining are virtually identical. Adjacent lung sections were double stained with CD31 antibody plus Tunel reagents or VE-cadherin antibody plus Tunel reagents. The numbers of CD31+/Tunel+ or VE-cadherin+/Tunel+ apoptotic ECs were counted and compared. Means  $\pm$  SEM of 5 mice per group are shown. \*,  $p < 0.05$ , compared to controls. VE-cadherin/Tunel double staining confirms the CD31/Tunel staining result.

**D:** Representative confocal microscopic images show that CD31+/Tunel+ and VE-cadherin+/Tunel+ cells are located at the same micro-anatomic locations. ECs on adjacent lung sections were stained red with fluorescent CD31 or VE-cadherin antibody. Apoptotic cells were stained green with Tunel reagents. Merging of the red and green images revealed CD31+/Tunel+ or VE-cadherin+/Tunel+ apoptotic ECs (arrow indicated "yellow" cells). The CD31+/Tunel+ (left) and VE-cadherin+/Tunel+ (right) apoptotic ECs were located at same micro-anatomic locations. Scale bar, 50  $\mu\text{m}$ .

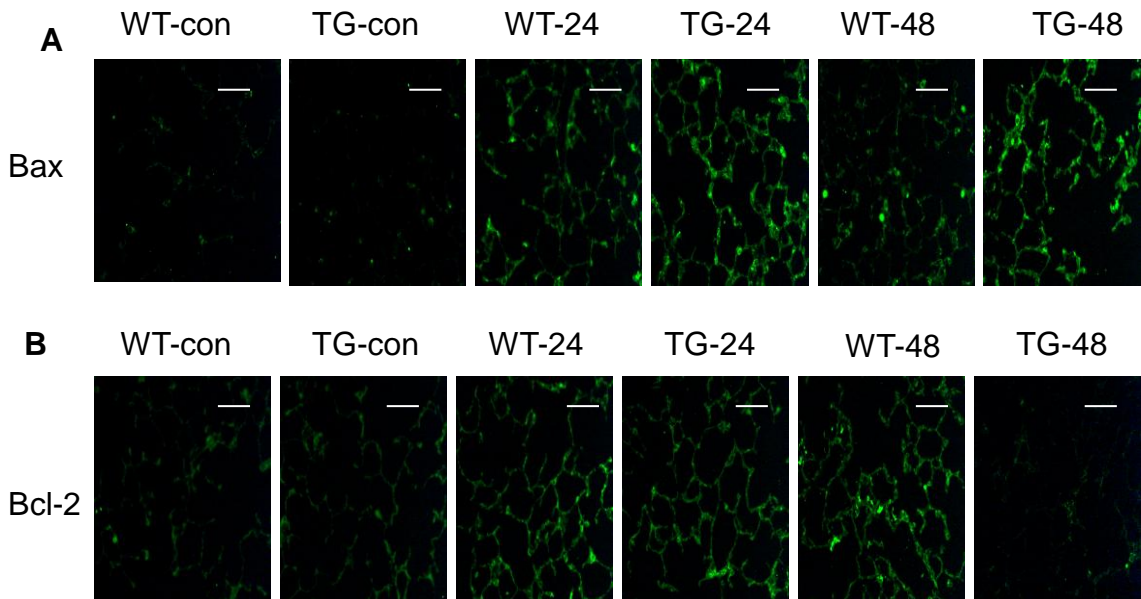

**Supplementary Figure 2.** Blockade of endothelial NF- $\kappa$ B at 48, but not 24, hours increases Bax and decreases Bcl-2 protein expression in lungs. Mice were injected with saline (Con) or LPS (other groups, 5 mg/kg, i.p.) and then with Dox (0.5 mg/mouse, i.p.) 12 hours prior to tissue collection. Lung cryosections were prepared at 24 or 48 hours after LPS injection and stained with Bax or Bcl-2 antibody followed by Alexa Fluor 488 conjugated secondary antibody.

**A:** Representative micrographs show Bax expression in the lungs. Bax<sup>+</sup> cells significantly increased at 24 hours and reduced at 48 hours in WT lungs. Blockade of endothelial NF- $\kappa$ B at 48, but not at 24, hours increased Bax-expressing (green) cells in TG lungs. The data are representative of 3 independent experiments. Scale bar, 50  $\mu$ m.

**B:** Representative micrographs show Bcl-2 expression in the lungs. Bcl-2<sup>+</sup> cells significantly increased at 24 and 48 hours in WT lungs. Endothelial NF- $\kappa$ B blockade at 48, but not at 24, hours reduced Bcl-2-expressing (green) cells in TG lungs. Representative of 3 independent experiments. Scale bar, 50  $\mu$ m.

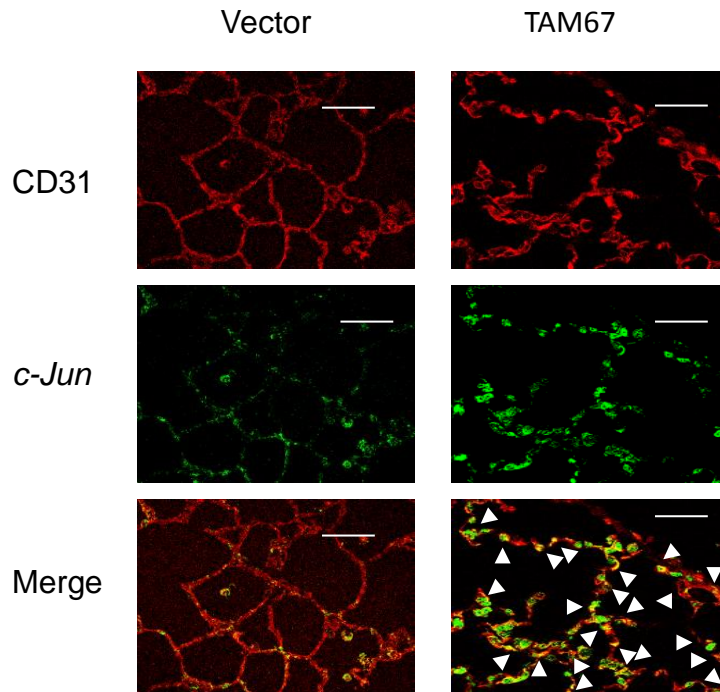

**Supplementary Figure 3.** Micrographs of CD31 (red) and *c-Jun* (green) double staining show that TAM67 transfection markedly increased *c-Jun*-expressing endothelial cells (ECs).

Mice were transfected with pCMV-vector or pCMV-TAM67 plasmid. At 3 days after transfection, lung cryosections were prepared and stained with CD31 (red) and *c-Jun* (green) antibodies. Lung sections from mice transfected with pCMV-TAM67 displayed many fold increase in numbers of CD31<sup>+</sup>/*c-Jun*<sup>+</sup> ECs, compared to lung sections from mice transfected with the pCMV-vector alone, confirming TAM67 overexpression in lung ECs. Scale bar, 50  $\mu$ m.

**A. Figure 1C**

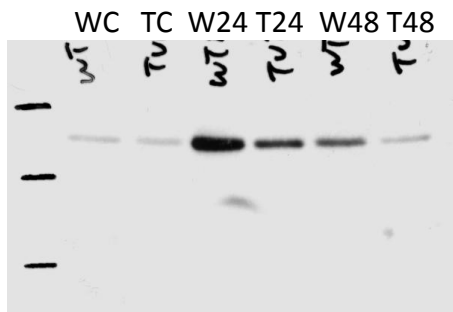

**B. Figure 1D**

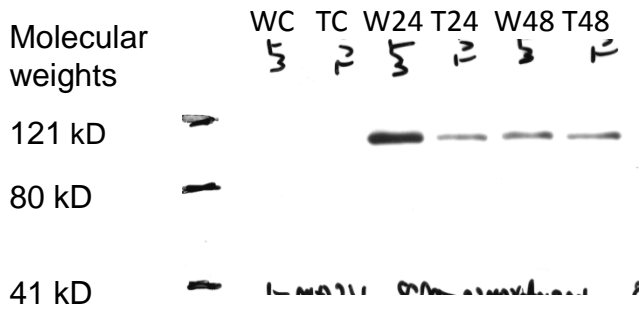

**C. Figure 5A**

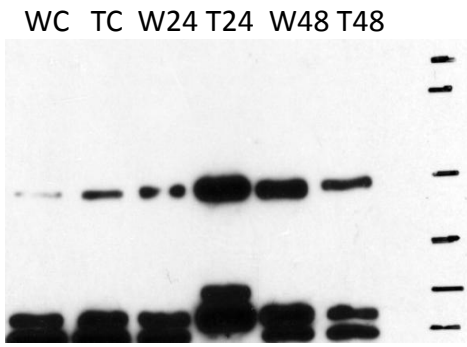

**D. Figure 5B**

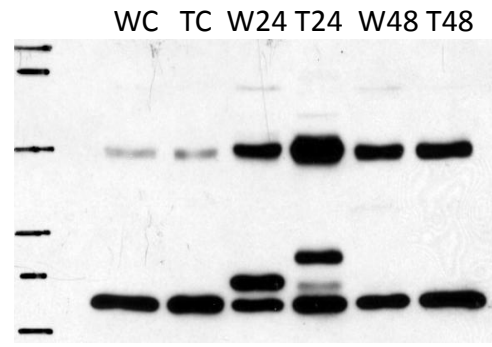

**E. Figure 8A**

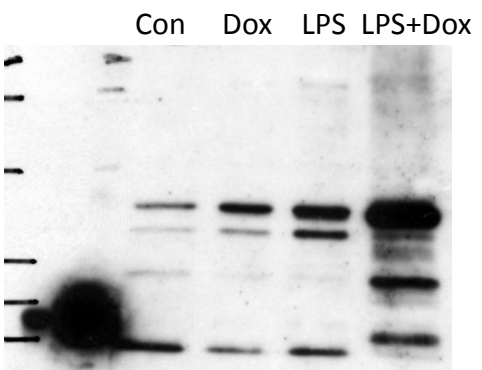

**F. Figure 8B**

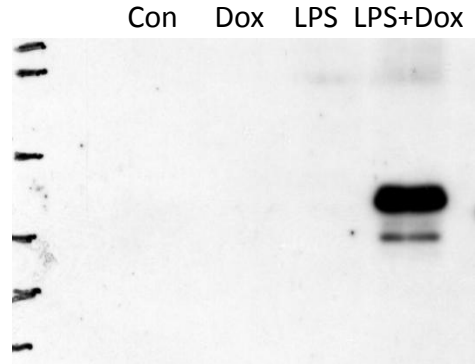

**G. Figure 8D**

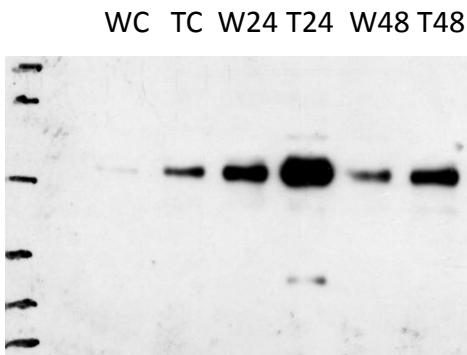

**H. Figure 8E**

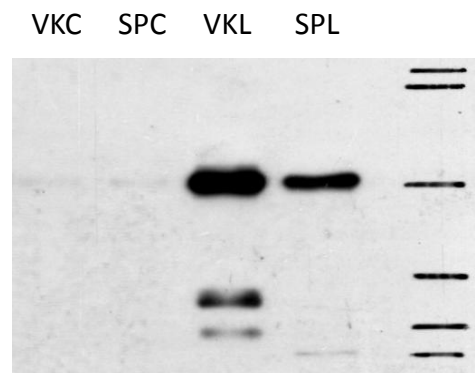

#### **Supplementary Figure 4 : Full-length images of the cropped blots presented in the main figures**

**A and B:** Full-length images of Figures 1C and 1D show that Dox-induced I- $\kappa$ B $\alpha$ mt expression, at or after peak of organ injury, inhibits VCAM-1 expression in lungs and heart. WC, wild type control; TC, transgenic control; W24, wild type 24 hours; T24, transgenic 24 hours; W48, wild type 48 hours; and T48, transgenic 48 hours.

**C and D:** Full-length images of Figures 5A and 5B show that inhibition of endothelial NF- $\kappa$ B at 24, but not at 48, hours increases nuclear levels of *c-Jun* and *c-Fos* in the lungs of transgenic mice.

**E:** Full-length image of Figure 8A shows that LPS or Dox stimulation alone caused an increase in nuclear *c-Jun* level. The increase in nuclear *c-Jun* level was even greater in the presence of both LPS and Dox. Con, control. Dox, doxycycline.

**F:** Full-length image of Figure 8B shows that LPS+Dox stimulation increased nuclear phospho-*c-Jun* (*p-c-Jun*, Ser63) level, while LPS or Dox alone did not.

**G:** Full-length image of Figure 8D shows that endothelial NF- $\kappa$ B inhibition at 24 hours increases JNK activity. The tissue level of phospho-JNK (p-JNK, Thr183/Tyr185, an indicator of JNK activity) in the lungs was determined.

**H:** Full-length image of Figure 8E shows that JNK inhibitor reduces *c-Jun* phosphorylation. Mice were pretreated with JNK inhibitor, SP600125, and injected with saline, LPS and Dox. Nuclear level of phospho-*c-Jun* (*p-c-Jun*) in lungs was determined by Western blot. VKC, vehicle control; SPC, SP600125 control; VKL, vehicle LPS; and SPL, SP600125 LPS.

Blots were adjusted for contrast/brightness to a similar extent as the cropped blots, and resized appropriately. Molecular weights are shown in the middle of two blots.
